# Supplementary material for: Click chemistry as a route to the synthesis of structurally new and magnetically interesting coordination clusters: a {NiII8} complex with a trapezoidal prismatic topology
Source: Royal Society of Chemistry journal article supplement (doi:10.1039/c9dt01998g), 2019-01-01
Supplement: c9dt01998g1.pdf [file c9dt01998g1.pdf]

## ELECTRONIC SUPPORTING INFORMATION

### **Click chemistry as a route to the synthesis of structurally new and magnetically interesting coordination clusters: A {Ni<sup>II</sup><sub>8</sub>} complex with a trapezoidal prismatic topology**

Parisa Abbasi,<sup>a</sup> Angeliki A. Athanasopoulou,<sup>a</sup> Eleni C. Mazarakioti,<sup>a</sup> Kevin J. Gagnon,<sup>b</sup> Simon J. Teat,<sup>b</sup> Albert Escuer,<sup>c</sup> Melanie Pilkington\*<sup>a</sup> and Theocharis C. Stamatatos\*<sup>a,d</sup>

---

<sup>a</sup> *Department of Chemistry, 1812 Sir Isaac Brock Way, Brock University, L2S 3A1 St. Catharines, Ontario, Canada.*

<sup>b</sup> *Advanced Light Source, Lawrence Berkeley National Laboratory, Berkeley, California, 94720, USA.*

<sup>c</sup> *Department de Química Inorgànica i Orgànica, Secció Inorgànica and Institut de Nanociència i Nanotecnologia (IN<sup>2</sup>UB), Universitat de Barcelona, Martí Franqués 1-11, 08028 Barcelona, Spain.*

<sup>d</sup> *Present address: Chemistry Department, University of Patras, Patras 26504, Greece. E-mail: thstama@upatras.gr; Tel: +30-2610996008.*

Corresponding authors: [mpilkington@brocku.ca](mailto:mpilkington@brocku.ca) (M. Pilkington); [thstama@upatras.gr](mailto:thstama@upatras.gr) (Th. C. Stamatatos)

## Experimental Section

**Synthesis.** All manipulations were performed under aerobic conditions using materials (reagent grade) and solvents as received, unless otherwise noted. **Caution!** Azide salts, and their corresponding metal complexes, are potentially explosive; such compounds should be synthesized and used in small quantities, and treated with utmost care at all times. Complex **1** was found to be safe when used in small quantities under the reported conditions.

**rac-mpmH:** To a solution of 2-acetylpyridine (3.00 g, 24.8 mmol) in methanol (50 mL) at 0 °C was added NaBH<sub>4</sub> (0.94 g, 25 mmol) portionwise over 10 mins. The reaction was allowed to warm to room temperature and stirred for 12 h. The reaction was concentrated to ~25 mL and then the residual borohydride was quenched by the dropwise addition of water. Once the effervescence had ceased, a further 75 mL water was added and extracted with EtOAc (3 × 50 mL). The combined organic layers were washed with brine, dried (Na<sub>2</sub>SO<sub>4</sub>) and the solvent removed *in vacuo* to yield the title compound (2.77 g, 91% yield) as a pale-yellow oil. M.p.: 53-54 °C. <sup>1</sup>H NMR (CDCl<sub>3</sub>, 400 MHz) δ (ppm): 8.53 (1H, d, *J* = 4.72 Hz, H7), 7.68 (1H, td, *J* = 7.79, 6.39 Hz, H5), 7.29 (1H, d, *J* = 7.94 Hz, H4), 7.19 (1H, dd, *J* = 5.29, 5.14 Hz, H6), 4.89 (1H, q, *J* = 6.57 Hz, H2), 4.10 (1H, s, OH), 1.50 (3H, d, *J* = 6.59 Hz, H1); <sup>13</sup>C NMR (CDCl<sub>3</sub>, 400 MHz) δ (ppm): 162.9 (C3), 147.9 (C7), 137.1 (C5), 122.3 (C4), 119.9 (C6), 68.8 (C2); IR (cm<sup>-1</sup>): 3356, 2975, 1595, 1477, 1364, 1282, 1081, 1017, 904, 784, 751, 608, 538. Elemental analysis (%) calcd for C<sub>7</sub>H<sub>9</sub>NO: C 68.27, H 7.37, N 11.37; found C 68.25, H 7.47, N 11.52.

**[Ni<sub>8</sub>(N<sub>3</sub>)<sub>8</sub>(mtz)<sub>4</sub>(rac-mpm)<sub>4</sub>(rac-mpmH)<sub>4</sub>] (1):** To a stirred, white suspension of *rac-mpmH* (0.025 g, 0.20 mmol) and NaN<sub>3</sub> (0.026 g, 0.40 mmol) in MeCN (15 mL) was added solid Ni(ClO<sub>4</sub>)<sub>2</sub>·6H<sub>2</sub>O (0.073 g, 0.20 mmol). The resulting green solution was stirred for 40 min, filtered, and left for slow evaporation at room temperature. After a period of two months, X-ray quality turquoise plate-like crystals of **1**·2.2H<sub>2</sub>O were formed, and these were collected by filtration, washed with cold MeCN (2 × 2 mL) and dried in air. The yield was 30 %. The air-dried, crystalline material was analyzed as **1**·2H<sub>2</sub>O. Elemental analysis

(%) calcd for  $\mathbf{1}\cdot 2\text{H}_2\text{O}$  (MW = 2155.25 g mol<sup>-1</sup>): C 35.67, H 3.93, N 31.19; found: C 35.59, H 3.86, N 31.32. Selected IR data (ATR):  $\nu = 2057$  (vs,  $\nu(\text{N-N})$ ), 1653 (m), 1601 (m), 1527 (m), 1380 (m), 1286 (m), 1177 (w), 1083 (m), 1052 (m), 1021 (m), 967 (m), 761 (s), 701 (m), 699 (m), 530 (w), 472 (m), 435 (m).

**Synthetic details.** For the successful synthesis of crystalline material of complex **1** some helpful hints should be noted. The 1:1:2 molar ratio between  $\text{Ni}(\text{ClO}_4)_2\cdot 6\text{H}_2\text{O}$ , *rac*-mpmH and  $\text{NaN}_3$  should be always kept constant for the clean and crystalline formation of **1**. Different ratios of the three reagents, i.e., 1:1:3, 1:2:2 and 2:1:2, still gave **1** but in much smaller yields and always contaminated with unreacted metal salts and/or  $\text{NaN}_3$ . Another important synthetic variable that should always be absent from this reaction is the external base. We noted that the addition of an external base, i.e.  $\text{R}_3\text{N}$  (R = Me, Et, etc), in the reaction that led to complex **1**, facilitated the rapid precipitation of amorphous green solids which could not be further characterized or crystallized.

**Physical Measurements.** Infrared spectra were recorded in the solid state on a Bruker's FT-IR spectrometer (ALPHA's Platinum ATR single reflection) in the 4000-400 cm<sup>-1</sup> range. NMR spectra were obtained on a Bruker Avance DPX-400 MHz instrument and are referenced to the residual proton signal of the deuterated solvent for <sup>1</sup>H spectra, and to the carbon multiplet of the deuterated solvent for the <sup>13</sup>C spectra, according to published values. Melting points were recorded on a Kofler hot-stage apparatus. Elemental analyses (C, H, and N) were performed by Atlantic Microlab Inc. Magnetic susceptibility studies were performed at the University of Barcelona, Chemistry Department, on a MPMS5 Quantum Design susceptometer. Pascal's constants were used to estimate the diamagnetic correction, which was subtracted from the experimental susceptibility to give the molar paramagnetic susceptibility ( $\chi_M$ ).<sup>S1</sup> The magnetic data were fit to the appropriate spin Hamiltonian using the PHI software.<sup>S2</sup> Quality of the fits were parametrized as  $R(\chi_M T) = (\chi_M T_{\text{exp}} - \chi_M T_{\text{calc}})^2 / (\chi_M T_{\text{exp}})^2$  and  $R(M) = (M_{\text{exp}} - M_{\text{calc}})^2 / (M_{\text{exp}})^2$ .

**Single-crystal X-ray Crystallography.** A turquoise plate-like crystal ( $0.120 \times 0.120 \times 0.050$  mm<sup>3</sup>) of  $\mathbf{1}\cdot 2.2\text{H}_2\text{O}$  was mounted on a MiTeGen kapton loop in the 100(2) K nitrogen

cold stream provided by an Oxford Cryosystems Cryostream 700 Plus apparatus. The crystal was transferred to the goniometer head of a Bruker D8 diffractometer equipped with a PHOTON 100 detector on beamline 11.3.1 at the Advanced Light Source in Berkeley National Laboratory. Diffraction data were collected in synchrotron radiation, monochromated using silicon(111) to a wavelength of 0.7749 Å. A total of 40016 reflections were collected, of which 4362 were unique ( $R_{\text{int}} = 0.0335$ ) and 3137 were observed [ $I > 2\sigma(I)$ ]. The structure was solved by intrinsic phasing and refined by full-matrix least-squares on  $F^2$  (SHELXL-2014/7)<sup>S3</sup> using 467 parameters and 695 restraints.

All fully occupied non-hydrogen atoms were refined anisotropically, except from the low occupancy disordered water molecules. Hydrogen atoms on the methyl groups were found in the difference map, while the remaining were placed as geometrically constrained and refined using a riding model. Hydrogen atoms could neither be found nor placed on the water molecules and one of the ligand oxygen atoms and therefore they were omitted from the refinement but not the chemical formula of the compound. Displacement and geometrical restraints were used to model the disorder of the ligands. The programs used for molecular graphics were MERCURY<sup>S4</sup> and DIAMOND.<sup>S5</sup> Unit cell parameters and structure solution and refinement data are listed in Table S1. Selected interatomic distances and angles are listed in Table S2. Crystallographic data for the structure reported in this work have been deposited to the Cambridge Crystallographic Data Centre (CCDC) as supplementary publication numbers: CCDC-1911866 (**1**). Copies of these data can be obtained free of charge on application to CCDC, 12 Union Road, Cambridge CB2 2EZ, UK; FAX: (+44) 1223 336033, or online via [www.ccdc.cam.ac.uk/data\\_request/cif](http://www.ccdc.cam.ac.uk/data_request/cif) or by emailing [data\\_request@ccdc.cam.ac.uk](mailto:data_request@ccdc.cam.ac.uk).

**Table S1.** Crystallographic data for complex **1**·2.2H<sub>2</sub>O

| Complex                  | <b>1</b> ·2.2H <sub>2</sub> O                                                       |
|--------------------------|-------------------------------------------------------------------------------------|
| Formula                  | C <sub>64</sub> H <sub>84.4</sub> N <sub>48</sub> Ni <sub>8</sub> O <sub>10.2</sub> |
| FW / g mol <sup>-1</sup> | 2159.07                                                                             |
| Crystal system           | Orthorhombic                                                                        |
| Space group              | Fddd                                                                                |
| <i>a</i> / Å             | 18.5858(8)                                                                          |

|                                                   |                       |
|---------------------------------------------------|-----------------------|
| $b / \text{Å}$                                    | 24.9993(10)           |
| $c / \text{Å}$                                    | 40.6220(17)           |
| $\alpha / ^\circ$                                 | 90                    |
| $\beta / ^\circ$                                  | 90                    |
| $\gamma / ^\circ$                                 | 90                    |
| $V / \text{Å}^3$                                  | 18874.3(14)           |
| $Z$                                               | 8                     |
| $T / \text{K}$                                    | 100(2)                |
| $\lambda / \text{Å}$                              | 0.7749                |
| Radiation type                                    | synchrotron           |
| $\theta$ range ( $^\circ$ ) for data collection   | 2.215 - 27.971        |
| $\rho_{\text{calc}} / \text{g cm}^{-3}$           | 1.520                 |
| $\mu / \text{mm}^{-1}$                            | 2.065                 |
| F(000)                                            | 8880                  |
| Measd / independent ( $R_{\text{int}}$ ) reflns   | 40016 / 4362 (0.0335) |
| Obsd reflns [ $I > 2\sigma(I)$ ]                  | 3137                  |
| $R_1^a$                                           | 0.0950                |
| $wR_2^b$                                          | 0.2535                |
| GOF on $F^2$                                      | 1.039                 |
| $(\Delta\rho)_{\text{max,min}} / \text{e Å}^{-3}$ | 1.002, -0.839         |

<sup>a</sup>  $R_1 = \Sigma(|F_o| - |F_c|) / \Sigma|F_o|$ . <sup>b</sup>  $wR_2 = [\Sigma[w(F_o^2 - F_c^2)^2] / \Sigma[w(F_o^2)^2]]^{1/2}$ ,  $w = 1 / [\sigma^2(F_o^2) + [(ap)^2 + bp]$ , where  $p = [\max(F_o^2, 0) + 2F_c^2] / 3$ .

**Table S2.** Selected interatomic distances (Å) and angles ( $^\circ$ ) for complex **1**·2.2H<sub>2</sub>O<sup>a</sup>

| <i>Bond lengths</i> |           |         |          |
|---------------------|-----------|---------|----------|
| Ni1-N1              | 1.980(17) | Ni2-N2  | 1.99(2)  |
| Ni1-N3b             | 2.133(7)  | Ni2-N5  | 2.077(7) |
| Ni1-N4              | 2.051(7)  | Ni2-N6c | 2.097(7) |
| Ni1-N10             | 2.112(6)  | Ni2-N7  | 2.094(8) |
| Ni1-N13             | 2.133(7)  | Ni2-N13 | 2.141(8) |
| Ni1-O1              | 2.067(8)  | Ni2-O2  | 2.045(7) |

| <i>Bond angles</i> |          |                  |      |
|--------------------|----------|------------------|------|
| Ni1-N13-Ni2        | 114.3(3) | Ni1-N4-N3-Ni1b   | 15.2 |
| Ni1-N10-Ni1b       | 108.0(4) | Ni1-N3b-N4b-Ni1b | 15.2 |
| Ni2-N7-Ni2b        | 109.5(6) | Ni2-N5-N6-Ni2b   | 13.3 |
| Ni1-N4-N5-Ni2      | 1.0      | Ni1-N6b-N5b-Ni1b | 13.3 |

<sup>a</sup> Symmetry-operations: a: 0.25-x, y, 1.25-z; b: 0.25-x, 1.25-y, z; c: x, 1.25-y, 1.25-z.

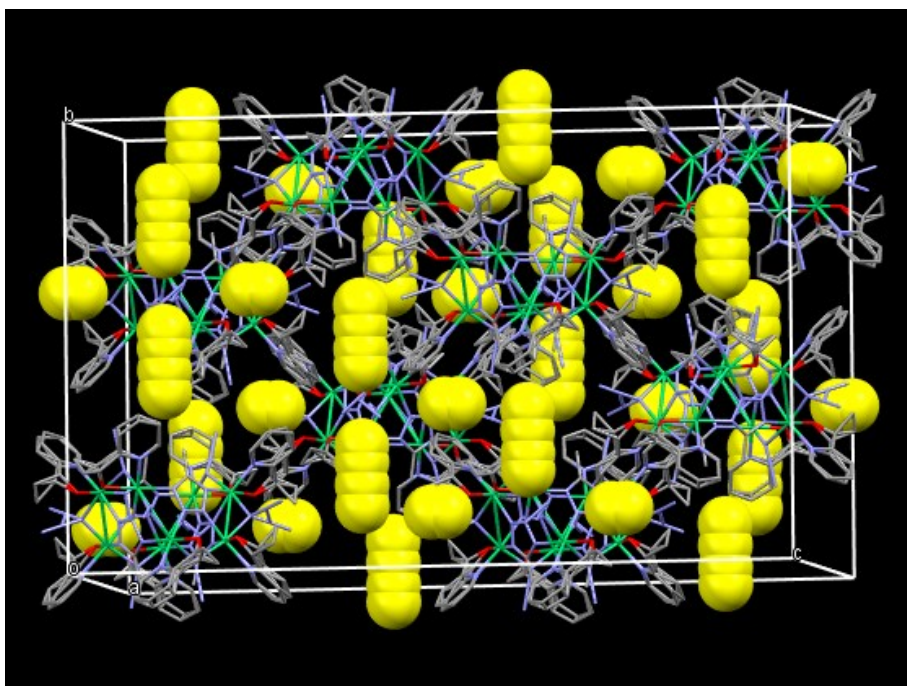

**Fig. S1** Packing diagram of **1**·2.2H<sub>2</sub>O. The lattice H<sub>2</sub>O molecules are shown in yellow space-filling representation, emphasizing their tendency to occupy the voids between adjacent {Ni<sub>8</sub>} clusters. Color scheme for the remaining atoms as in Fig. 1 of the main text.

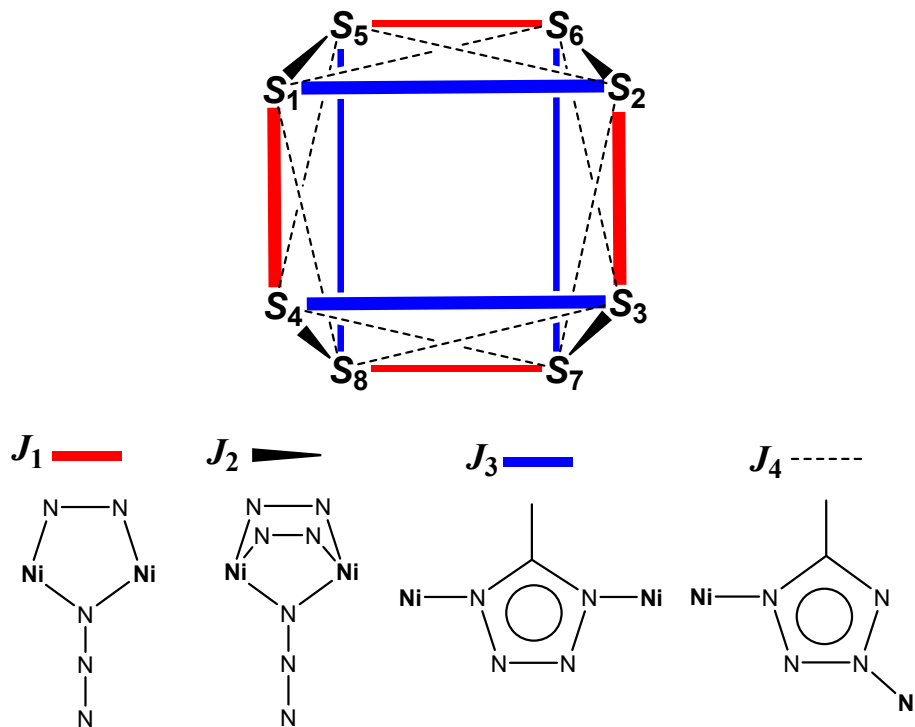

**Fig. S2** Coupling scheme and the four superexchange pathways used to describe the magnetic exchange interactions in complex **1**.

**Additional Magnetic Discussion.** Based on the employed spin Hamiltonian (see eqn (1) in the main text), we performed several fits in order to check the influence of each coupling constant in the fitting procedure, neglecting selectively one of the interactions at a time. Despite the obtained good results for the susceptibility data, these alternative fits gave unreliable values of poor magneto-chemical sense for the  $J$  coupling constants, such as a larger ferromagnetic interaction for  $J_2$  (compared to  $J_1$ ) or different signs for  $J_1$  and  $J_2$ , to name a few. The only case in which the negligence of a  $J$ -coupling constant gave good susceptibility and magnetization fits, as well as reasonable magneto-chemical results for the remaining parameters, is that of  $J_2$  (see Table S3, red colored row).

**Table S3.**  $J$  values ( $\text{cm}^{-1}$ ) and  $R$  quality factor for the attempted additional fits, neglecting selectively one of the coupling constants at a time.

| Excluded $J$ constant | $J_1$      | $J_2$      | $J_3$      | $J_4$      | $g$  | $R(\chi_{MT})$      | $R(M)$              |
|-----------------------|------------|------------|------------|------------|------|---------------------|---------------------|
| $J_1$                 | <b>0.0</b> | +7.8       | -1.6       | -1.0       | 2.21 | $4.2 \cdot 10^{-5}$ | $4.8 \cdot 10^{-2}$ |
| $J_2$                 | +11.5      | <b>0.0</b> | -1.7       | -1.3       | 2.18 | $3.2 \cdot 10^{-5}$ | $1.4 \cdot 10^{-3}$ |
| $J_3$                 | -2.8       | +7.7       | <b>0.0</b> | -0.3       | 2.20 | $3.0 \cdot 10^{-5}$ | $5.4 \cdot 10^{-2}$ |
| $J_4$                 | +0.9       | +7.9       | -3.8       | <b>0.0</b> | 2.20 | $1.8 \cdot 10^{-5}$ | $4.8 \cdot 10^{-2}$ |

## References

- <sup>S1</sup> G. A. Bain and J. F. Berry, *J. Chem. Educ.*, 2008, **85**, 532.
- <sup>S2</sup> N. F. Chilton, R. P. Anderson, L. D. Turner, A. Soncini and K. S. Murray, *J. Comput. Chem.*, 2013, **34**, 1164.
- <sup>S3</sup> G. M. Sheldrick, *Acta Cryst.*, 2008, **A64**, 112.
- <sup>S4</sup> *Mercury*; I. J. Bruno, J. C. Cole, P. Edgington, M. K. Kessler, C. F. Macrae, P. McCabe, J. Pearson and R. Taylor, *Acta Crystallogr., Sect. B*, 2002, **58**, 389.
- <sup>S5</sup> K. Bradenburg, *DIAMOND, Release 3.1f, Crystal Impact GbR*; Bonn, Germany, 2008.
